# Supplementary material for: Tempering of cocoa butter and chocolate using minor lipidic components
Source: PubMed Central journal article supplement (PMC8408162; doi:10.1038/s41467-021-25206-1), 2021-08-31
Supplement: 41467_2021_25206_MOESM3_ESM.pdf [file 41467_2021_25206_MOESM3_ESM.pdf]

## **Description of Additional Supplementary Files**

File Name: Supplementary Movie 1

Description: Volume rendering camera orbit of synchrotron micro-CT data for a molten and recrystallized commercial chocolate sample with added DMPC (DMPC)

File Name: Supplementary Movie 2

Description: Volume rendering camera orbit of synchrotron micro-CT data for a molten and recrystallized commercial chocolate sample with added DPPE (DPPE)

File Name: Supplementary Movie 3

Description: Volume rendering camera orbit of synchrotron micro-CT data for a fresh commercial chocolate sample (Lindt-F)

File Name: Supplementary Movie 4

Description: Volume rendering camera orbit of synchrotron micro-CT data for a molten and recrystallized commercial chocolate sample (Lindt-R)
